# Supplementary material for: Kite-Shaped Molecules Block SARS-CoV-2 Cell Entry at a Post-Attachment Step
Source: MDPI journal article supplement (doi:10.3390/v13112306), 2021-11-19
Supplement: s1 [file s1]

# **Kite-shaped molecules block SARS-CoV-2 cell entry at a post-attachment step**

**Running title: Repurposing for coronaviruses.**

**Shiu-Wan Chan\*, Talha Shafi and Robert C. Ford**

**Faculty of Biology, Medicine and Health, School of Biological Sciences, The University of Manchester, Michael Smith Building, Oxford Road, Manchester M13 9PT, United Kingdom**

## **Supplementary information**

**Table S1**

**Table S2**

**Table S3**

**Table S4**

**Figure S1**

**Figure S2**

**Figure S3**

**Figure S4**

**Figure S5**

**Figure S6**

**Figure S7**

**Figure S8**

**Table S1.** Kinases with similar structures to vandetanib are false positives

|                           |                                                                                     | % infectivity<br>of <sup>a</sup> SARS-2-<br>spike pv | % viability<br>of SARS-<br>2-spike pv | % infectivity<br>of <sup>b</sup> VSV-G<br>pv | Targets                                                      |
|---------------------------|-------------------------------------------------------------------------------------|------------------------------------------------------|---------------------------------------|----------------------------------------------|--------------------------------------------------------------|
| vandetanib                | 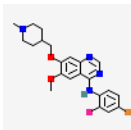   | 1                                                    | 89                                    | 125                                          | tyrosine kinase<br>°VEGFR/EGFR                               |
| cediranib (AZD217)        |    | 5                                                    | 85                                    | 42                                           | VEGFR                                                        |
| MLN8237 (Aisertib)        |    | 15-18                                                | 63-83                                 | 18                                           | Aurora kinase inhibitor<br>(serine/threonine protein kinase) |
| Foretinib<br>(GSK1363089) |   | 10                                                   | 63                                    | 11                                           | VEGFR and hepatocyte growth<br>factor receptor               |
| Axitinib (AG 013736)      |  | 1                                                    | 69                                    | 2                                            | VEGFR1/c-Kit inhibitor                                       |
| LY2784544                 |  | 2                                                    | 76                                    | 1                                            | Janus kinase 2                                               |
| GS-9973                   |  | 0                                                    | 69                                    | 1                                            | spleen tyrosine kinase                                       |
| dinaciclilb               |  | 0                                                    | 55                                    | 1                                            | cyclin-dependent kinases                                     |

<sup>a</sup>SARS-2-spike pv severe acute respiratory syndrome coronavirus 2 spike protein pseudovirus

<sup>b</sup>VSV-G pv vesicular stomatitis virus glycoprotein pseudovirus

<sup>c</sup>VEGFR/EGFR vascular endothelial growth factor receptor/ epidermal growth factor receptor  
drug structures obtained from PubChem

**Table S2.** Oestrogen receptor modulators with similar structures are a hit and a false positive

|                  |                                                                                     |                                                                                     | % infectivity of <sup>a</sup> SARS-2-spike pv | % viability of SARS-2-spike pv | % infectivity of <sup>b</sup> VSV-G pv |
|------------------|-------------------------------------------------------------------------------------|-------------------------------------------------------------------------------------|-----------------------------------------------|--------------------------------|----------------------------------------|
| bazedoxifene Hcl | 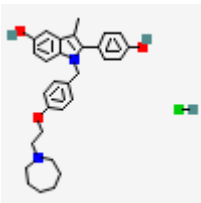   |    | 3                                             | 88                             | 13                                     |
| raloxifene HCl   |  |  | 5                                             | 92                             | 65                                     |

<sup>a</sup>SARS-2-spike pv severe acute respiratory syndrome coronavirus 2 spike protein pseudovirus

<sup>b</sup>VSV-G pv vesicular stomatitis virus glycoprotein pseudovirus

drug structures obtained from PubChem

**Table S3.** Kite-shaped molecules in order of inhibition of pseudovirus infectivity.

|                 | % infectivity <sup>a</sup> | % viability <sup>b</sup> | 2D structure                                                                         | 3D structure                                                                          |
|-----------------|----------------------------|--------------------------|--------------------------------------------------------------------------------------|---------------------------------------------------------------------------------------|
| chlorprothixene | 4.1                        | 97                       | 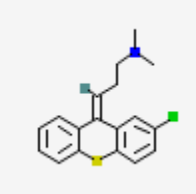 |  |

|                         |      |     |                                                                                      |                                                                                       |
|-------------------------|------|-----|--------------------------------------------------------------------------------------|---------------------------------------------------------------------------------------|
| asenapine               | 4.38 | 92  | 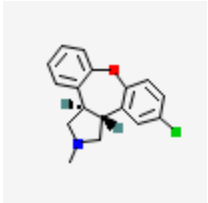   |    |
| Trifluoperazine<br>2HCl | 4.84 | 83  |    |    |
| thioridazine HCL        | 5.98 | 71  |    |    |
| Chlorpromazine<br>HCl   | 6.24 | 65  |   |   |
| Pizotifen Malate        | 7.01 | 106 |  |  |
| Amitriptyline HCl       | 9.05 | 112 |  |  |
| Clomipramine<br>HCl     | 9.23 | 115 |  |  |

|                     |       |     |                                                                                      |                                                                                       |
|---------------------|-------|-----|--------------------------------------------------------------------------------------|---------------------------------------------------------------------------------------|
| maprotiline hcl     | 9.38  | 99  | 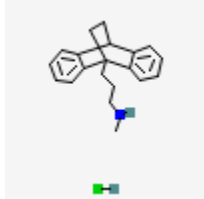   |    |
| cyclobenzaprine HCl | 9.49  | 101 |    |    |
| Desloratadine       | 10.25 | 99  |    |    |
| promethazine HCl    | 11.32 | 99  |   |   |
| Carvedilol          | 13.1  | 81  |  |  |
| trimipramine        | 13.54 | 92  |  |  |
| MLN8237             | 15.36 | 63  |  |  |

|                              |       |     |                                                                                      |                                                                                       |
|------------------------------|-------|-----|--------------------------------------------------------------------------------------|---------------------------------------------------------------------------------------|
| S/GSK1349572                 | 16.2  | 94  | 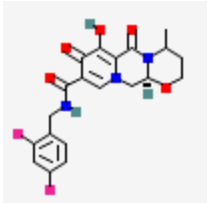   |    |
| Imipramine-                  | 16.34 | 99  |    |    |
| Prochlorperazine             | 16.41 | 94  |    |    |
| Cyproheptadine hydrochloride | 16.9  | 94  |   |   |
| amoxapine                    | 19.9  | 103 |  |  |
| Olanzapine                   | 26.22 | 106 |  |  |
| elacridar                    | 27.04 | 97  |  |  |

|                       |       |     |                                                                                      |                                                                                       |
|-----------------------|-------|-----|--------------------------------------------------------------------------------------|---------------------------------------------------------------------------------------|
| Clozapine             | 28.31 | 103 | 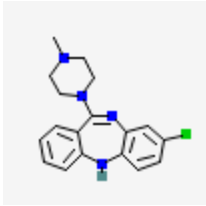   |    |
| Loxapine Succinate    | 35.01 | 94  |    |    |
| Dehydrocostus Lactone | 36.23 | 90  |    |    |
| Rupatadine Fumarate   | 38.01 | 74  |   |   |
| mianserin Hcl         | 41.95 | 100 |  |  |
| Clofazimine           | 45.61 | 77  |  |  |
| Mesoridazine besylate | 48.73 | 97  |  |  |

|                       |       |     |                                                                                      |                                                                                       |
|-----------------------|-------|-----|--------------------------------------------------------------------------------------|---------------------------------------------------------------------------------------|
| conivaptan hcl        | 51.97 | 102 |    |    |
| Tacrine hydrochloride | 57.04 | 97  |    |    |
| Ketotifen Fumarate    | 60.4  | 97  |    |    |
| Ionafarnib            | 64.73 | 111 |   |   |
| loratadine            | 67.15 | 94  |  |  |
| Diphenhydramine HCl   | 67.66 | 101 |  |  |
| Mirtazapine           | 72.63 | 104 |  |  |



|                |       |     |                                                                                      |                                                                                       |
|----------------|-------|-----|--------------------------------------------------------------------------------------|---------------------------------------------------------------------------------------|
| Epinastine HCl | 72.78 | 94  | 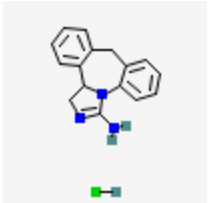   |    |
| Etodolac       | 76.15 | 100 |    |    |
| Carprofen      | 80.32 | 103 |    |    |
| Nevirapine     | 80.71 | 103 |   |   |
| Carbamazepine  | 81.27 | 105 |  |  |
| Diacerein      | 81.89 | 126 |  |  |
| Alcaftadine    | 85.44 | 97  |  |  |

|                         |       |     |                                                                                      |                                                                                       |
|-------------------------|-------|-----|--------------------------------------------------------------------------------------|---------------------------------------------------------------------------------------|
| Pranoprofen             | 87.46 | 114 | 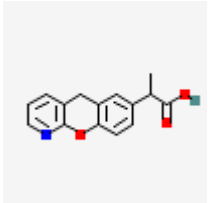   |    |
| Eslicarbazepine acetate | 90.75 | 102 |    |    |
| Olopatadine HCl         | 91.21 | 99  |    |    |
| Dibenzothiophene        | 92.11 | 102 |   |   |
| Tianeptine sodium       | 94.8  | 102 |  |  |
| Oxcarbazepine           | 95.77 | 109 |  |  |
| flumazenil              | 99.18 | 104 |  |  |

|                     |        |     |                                                                                      |                                                                                       |
|---------------------|--------|-----|--------------------------------------------------------------------------------------|---------------------------------------------------------------------------------------|
| Quetiapine Fumarate | 99.77  | 96  | 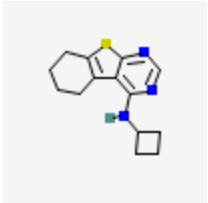   |    |
| 8-methoxypsoralen   | 100.26 | 105 |    |    |
| Ramelteon           | 104.18 | 99  |    |    |
| Aloin               | 107.91 | 103 |   |   |
| 5-methoxypsoralen   | 109.79 | 111 |  |  |
| quetiapine          | 112.56 | 101 |  |  |

a % infectivity relative to the infected, DMSO control

b % viability relative to the un-infected, DMSO control

drug structures obtained from PubChem



**Table S4.** Water solubility of kite-shaped molecules and hydroxychloroquine

| Drug                        | water solubility <sup>a</sup> | water solubility <sup>b</sup> |
|-----------------------------|-------------------------------|-------------------------------|
| hydroxychloroquine sulphate | 60 $\mu$ M                    | 200mM                         |
| chlorprothixene HCl         | 0.9 $\mu$ M                   | 28mM                          |
| asenapine maleate           | 78 $\mu$ M                    | 9mM                           |
| trifluoperazine HCl         | 18 $\mu$ M                    | 104mM                         |
| thioridazine HCl            | 2.1 $\mu$ M                   | 122mM                         |
| chlorpromazine HCl          | 12 $\mu$ M                    | 141mM                         |
| pizotifen malate            | 16 $\mu$ M                    | 0.3mM <sup>c</sup>            |
| amitriptyline HCl           | 14 $\mu$ M                    | 99mM                          |
| clomipramine HCl            | 41 $\mu$ M                    | 71mM                          |
| maprotiline HCl             | 150 $\mu$ M                   | 159mM                         |
| trimipramine maleate        | 88 $\mu$ M                    | 5mM                           |

a Values are predictions for the uncharged form obtained from <https://go.drugbank.com>

b. Values are for the salts and from chemical supplier datasheets, where available.

c. In a 1:8 dimethylformamide:water mixture.

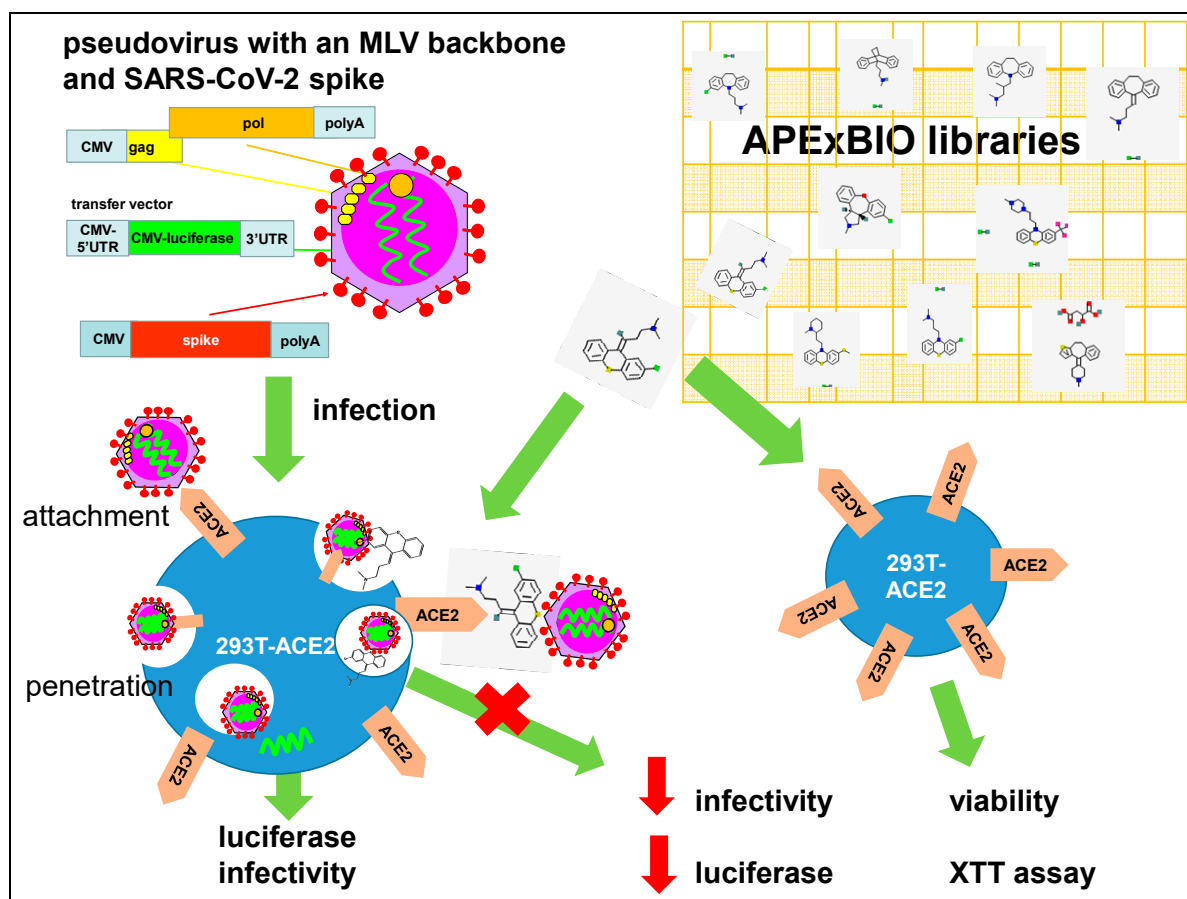

**Figure S1. SARS-CoV-2 pseudotyped virus in anti-viral drug screening.**

Pseudovirus was generated on a mouse leukaemia virus (MLV) backbone using a three-plasmid system consisting of an expression vector for MLV *gag* and *pol*, a transfer vector carrying a luciferase reporter gene and an expression vector encoding the SARS-CoV-2 spike protein. Pseudovirus was used to infect 293T cells stably expressing the human angiotensin-converting enzyme 2 (ACE2). Pseudovirus entry was mediated by the binding of the spike protein to the ACE2 which then undergoes receptor-mediated endocytosis to trigger endosomal fusion to release the luciferase reporter gene into cell cytoplasm. Infectivity was measured as luciferase read-out. Drugs from two APEXBio libraries were screened for their ability to inhibit infectivity by measuring the reduction in luciferase activity. Since the spike protein only mediates virus entry, the pseudovirus system could be used to identify drug hits that inhibit SARS-CoV-2 entry steps only. Drug cytotoxicity was measured using an XTT viability assay in non-infected cells. Drug images were obtained from PubChem and

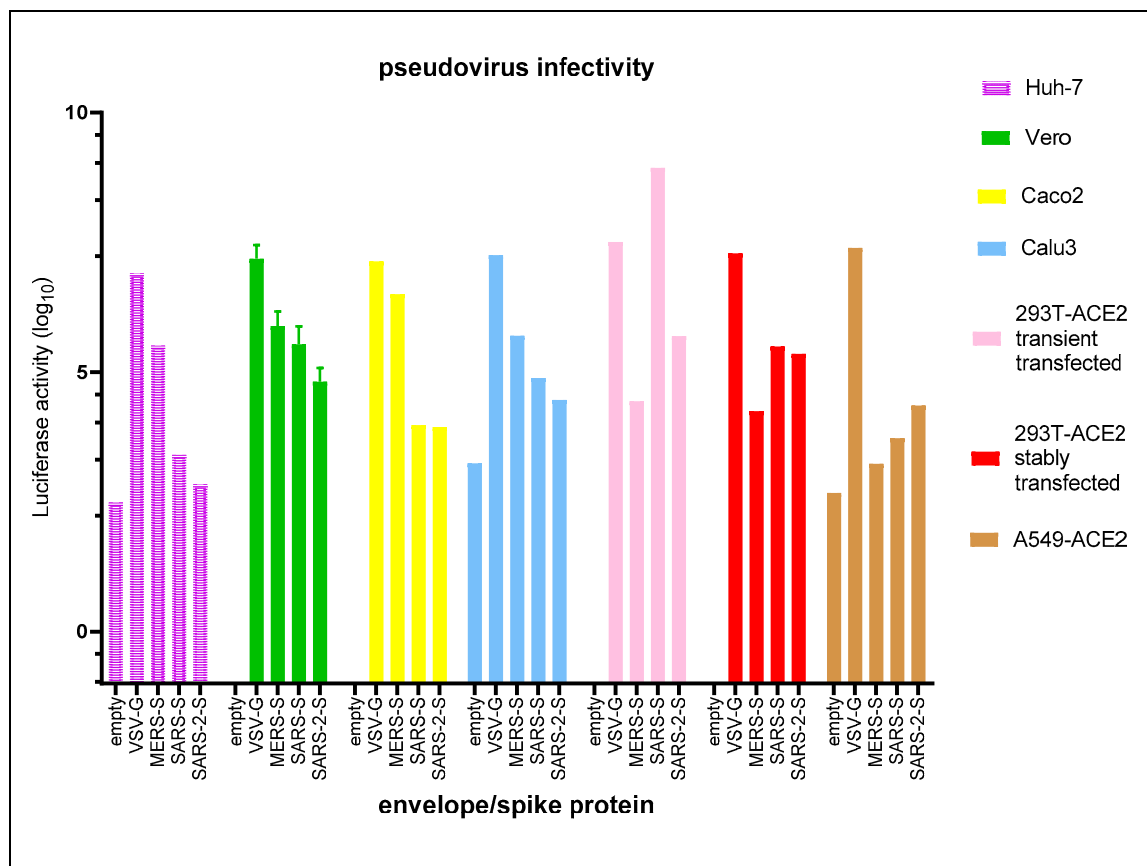

**Figure S2. Infectivity of pseudoviruses in a range of cell types.**

Mouse leukaemia virus pseudotyped with no envelope protein (empty), glycoprotein from vesicular stomatitis virus (VSV-G) and spike protein (S) from Middle East respiratory syndrome coronavirus (MERS-S), severe acute respiratory syndrome coronavirus (SARS-S) and SARS-2-S was used to infect a range of cell types, as indicated, in 24-well plates for 72h. Infectivity was measured as luciferase activity. Data represent the mean of two repeats for Vero cells and one experimental result for the other cell types.

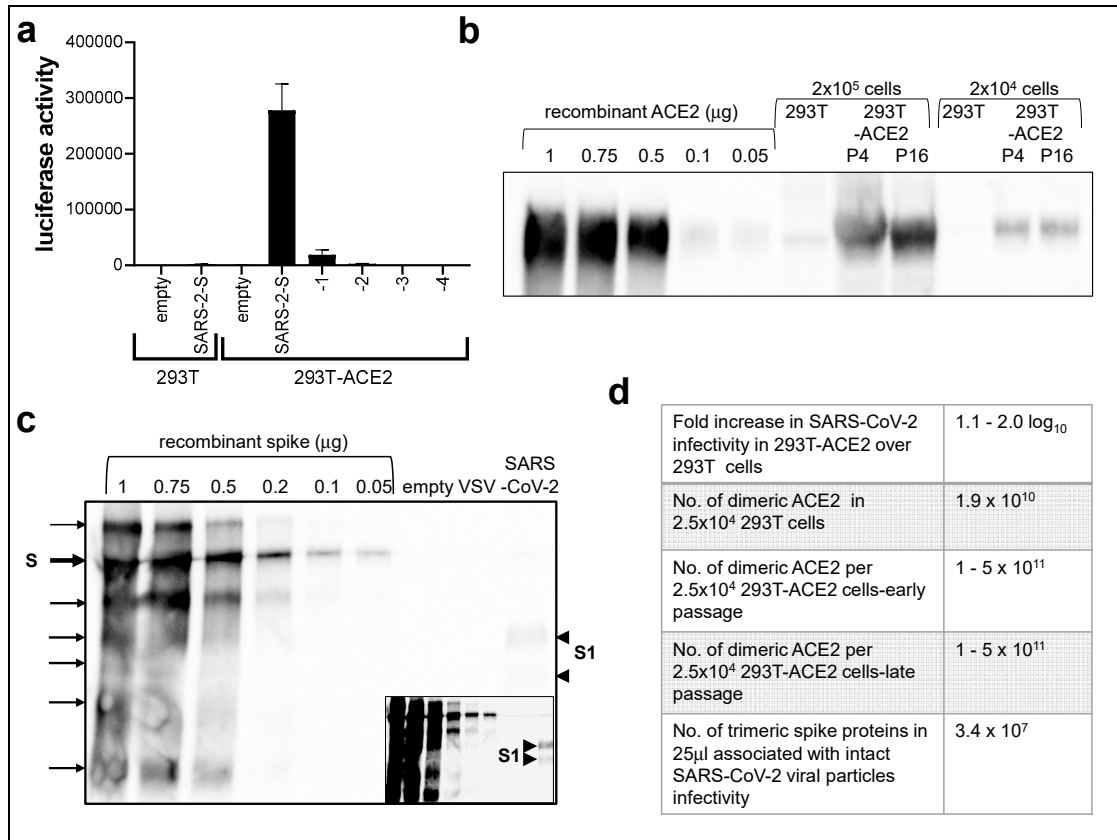

**Figure S3. Quantification of ACE2 and spike protein.**

(a) Serial ten-fold dilutions of the SARS-CoV-2-S pseudotyped virus were used to infect 293T-ACE2 cells. Luciferase activity was measured at 72h and compared to that of 293T cells infected with undiluted pseudovirus. Data are presented as mean  $\pm$  SD of two repeats.

(b) Western blot of ACE2 from 2.5x10<sup>5</sup> and 2.5x10<sup>4</sup> 293T cells and 293T-ACE2 cells from early (P4) and late (P16) passages. The protein bands were quantified against a standard curve of recombinant ACE2. (c) Western blot of spike protein from 10 $\mu$ l of empty, VSV-G and SARS-CoV-2-S pseudovirus particles. The protein bands were quantified against a standard curve of recombinant spike protein. The spike protein in the SARS-CoV-2-S pseudovirus has been cleaved to yield the S1 subunit. The inset shows the same blot at higher contrast for clarity. Low exposure blot was used in quantification. The recombinant protein is near full-length and has been stabilized with the removal of the furin-cleavage site and exhibits many glycosylated and degraded forms. (d) A table summarizing the



calculations. After estimating the  $\mu\text{g}$  of ACE2/spike proteins from the standard curve, the number of molecules was calculated by converting  $\mu\text{g}$  into moles multiplied by Avogadro's number. The range reflects data calculated from  $2.5 \times 10^5$  and  $2.5 \times 10^4$  cell loading. The number of spike proteins was adjusted using the assumption that 76% of the spike protein are not associated with viral particles (they are secreted or degraded virion associated with extracellular vesicles). Amongst the viral particles, 80% are empty viral particles (non-infectious, no genome but retain spike) and the rest of the 20% intact particles had 0.4% infectivity (1).

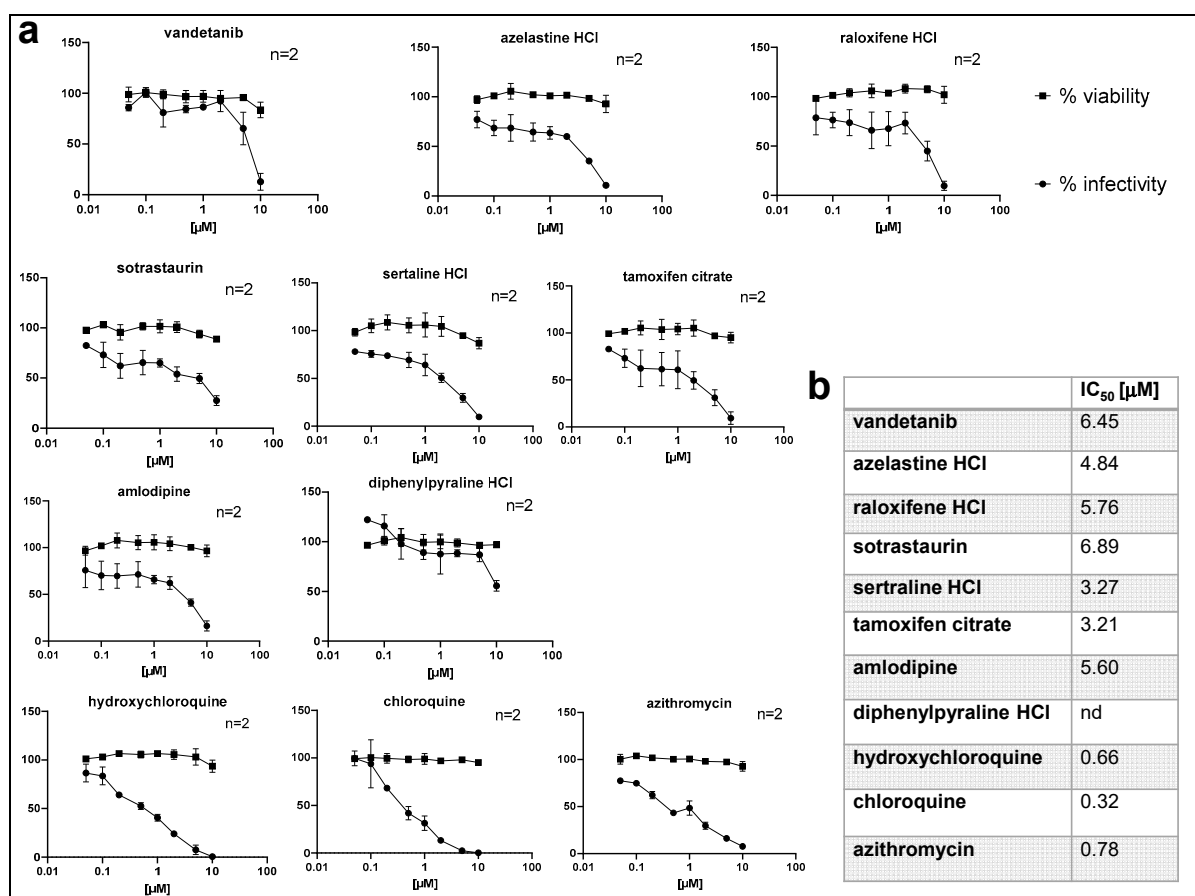

**Figure S4. Dose-response curves of top hits in SARS-CoV-2-S inhibition.** Mouse leukaemia virus pseudotyped with spike protein (S) from severe acute respiratory syndrome coronavirus-2 was used to infect 293T-ACE2 cells in 96-well plates for 48h in the presence of serial doses of the drug, as indicated, with 1h pre-treatment. (a) Infectivity was measured

as luciferase activity and expressed as % infectivity to infected, own solvent control (dimethylsulphoxide or water). Viability was measured by XTT assays in un-infected cells and expressed as % viability to un-infected solvent control (dimethylsulphoxide or water). Data are presented as mean +/- SD of two repeats. The square symbols are for cell viability (% of control) and the round symbols are for infectivity by the pseudovirus (% of control).

(b) Summary of IC<sub>50</sub> values. nd=not determined.

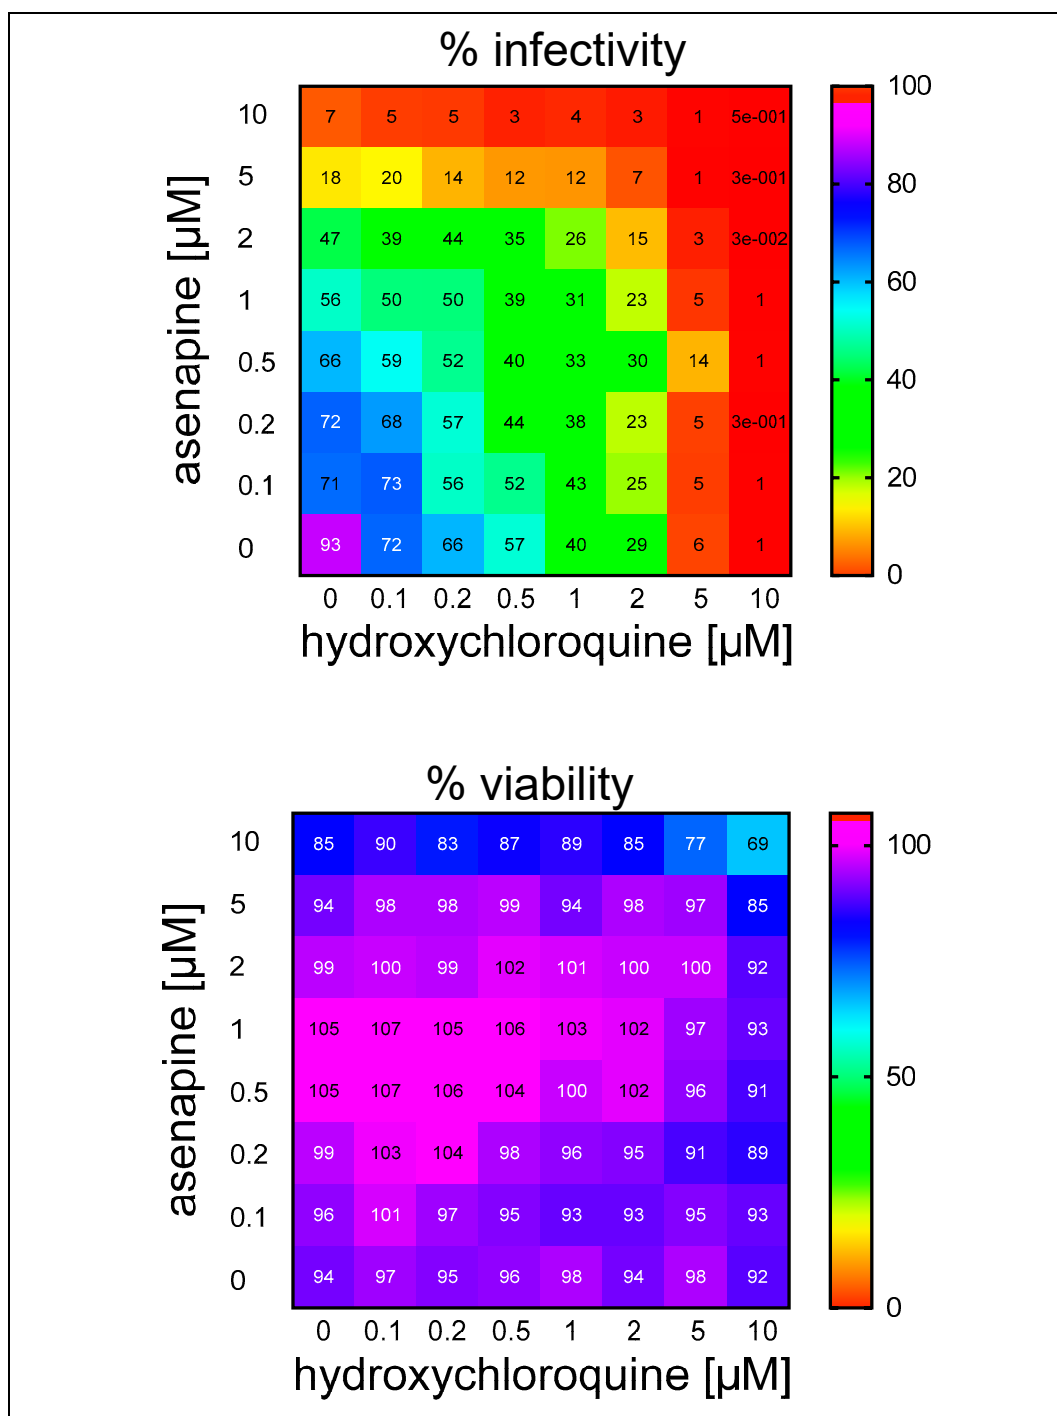

**Figure S5. Asenapine and hydroxychloroquine show additive inhibitory effect on SARS-CoV-2 infectivity.** Mouse leukaemia virus pseudotyped with spike protein (S) from severe acute respiratory syndrome coronavirus-2 was used to infect 293T-ACE2 cells in 96-well plate for 48h in the presence of serial doses of the asenapine and hydroxychloroquine, as indicated, with 1h pre-treatment. Infectivity was measured as luciferase activity and

expressed as % infectivity to infected, own solvent control (dimethylsulphoxide or water).

Viability was measured by XTT assays in un-infected cells and expressed as % viability to un-infected solvent control (dimethylsulphoxide or water). Data are presented as heat maps generated using Prism9.0 (GraphPad). Data are from one repeat.

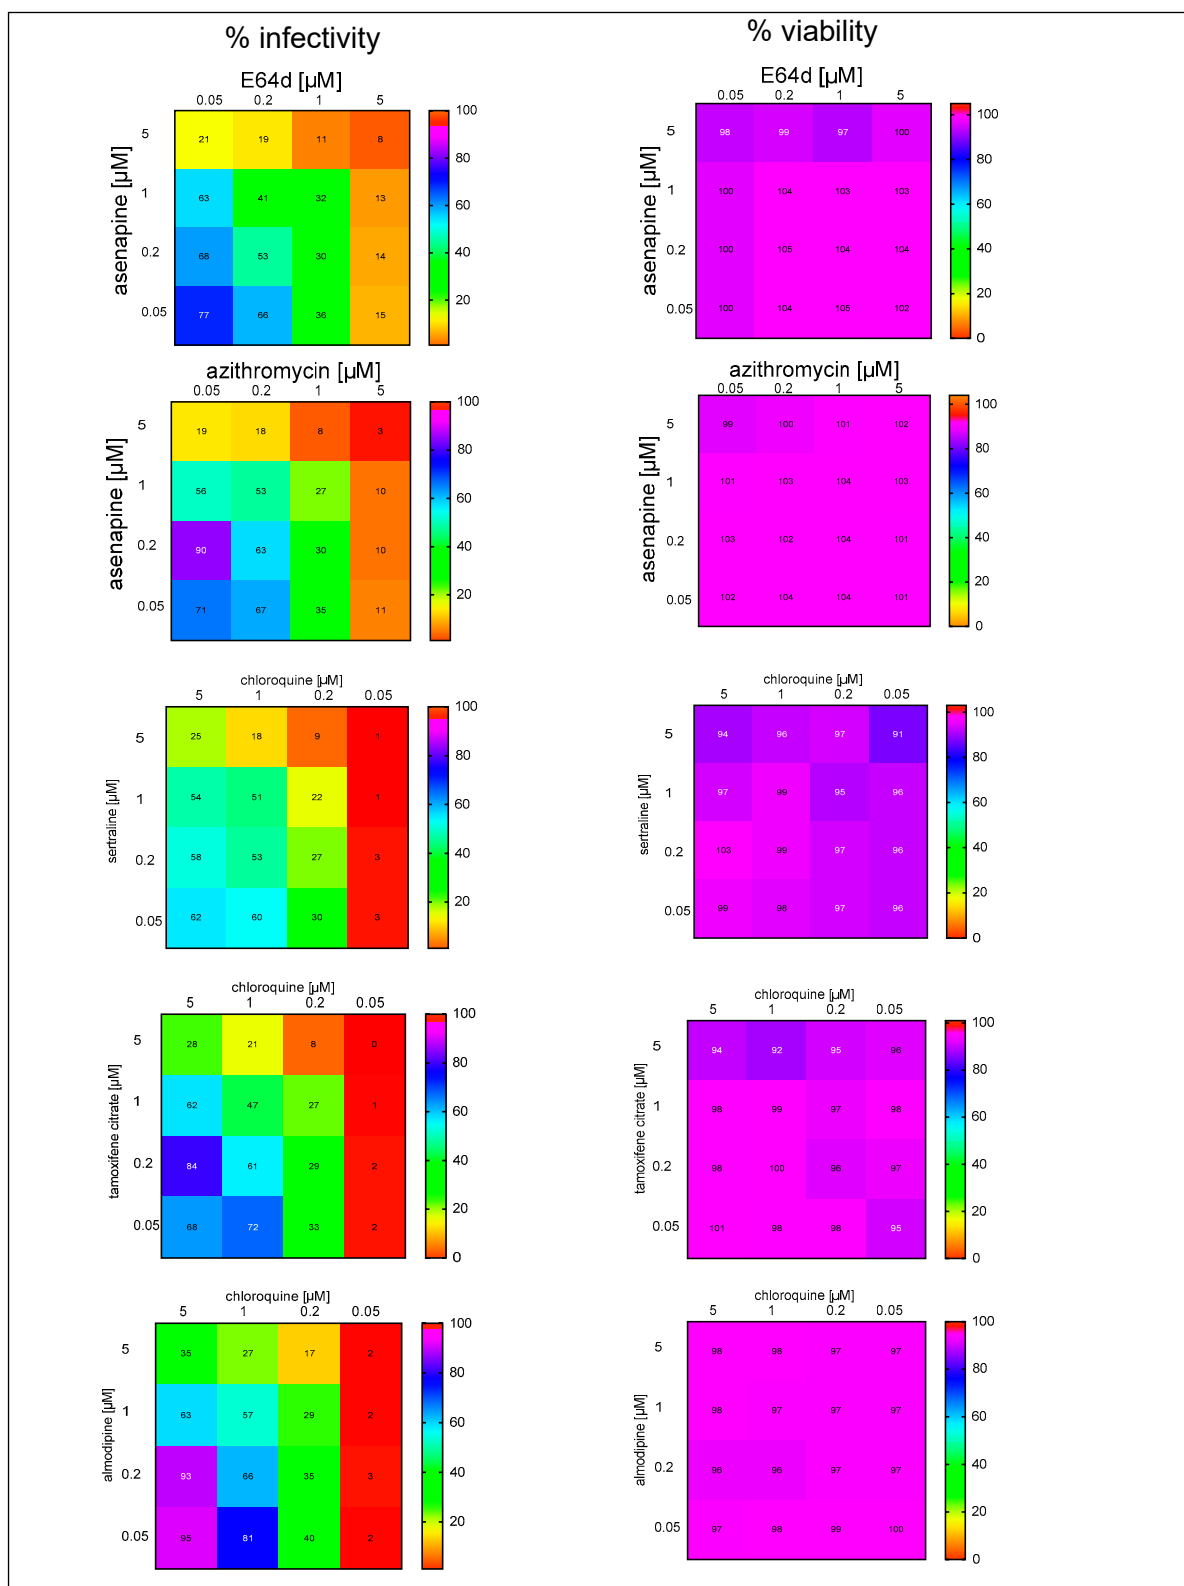

**Figure S6. Drug hits show additive inhibitory effect on SARS-CoV-2 infectivity.** Mouse leukaemia virus pseudotyped with spike protein (S) from severe acute respiratory syndrome coronavirus-2 was used to infect 293T-ACE2 cells in 96-well plate for 48h in the presence of

serial doses of the drug combination, as indicated, with 1h pre-treatment. Infectivity was measured as luciferase activity and expressed as % infectivity to infected, own solvent control (dimethylsulphoxide or water). Viability was measured by XTT assays in un-infected cells and expressed as % viability to un-infected solvent control (dimethylsulphoxide or water). Data are presented as heat maps generated using Prism9.0 (GraphPad). Data are from one repeat.

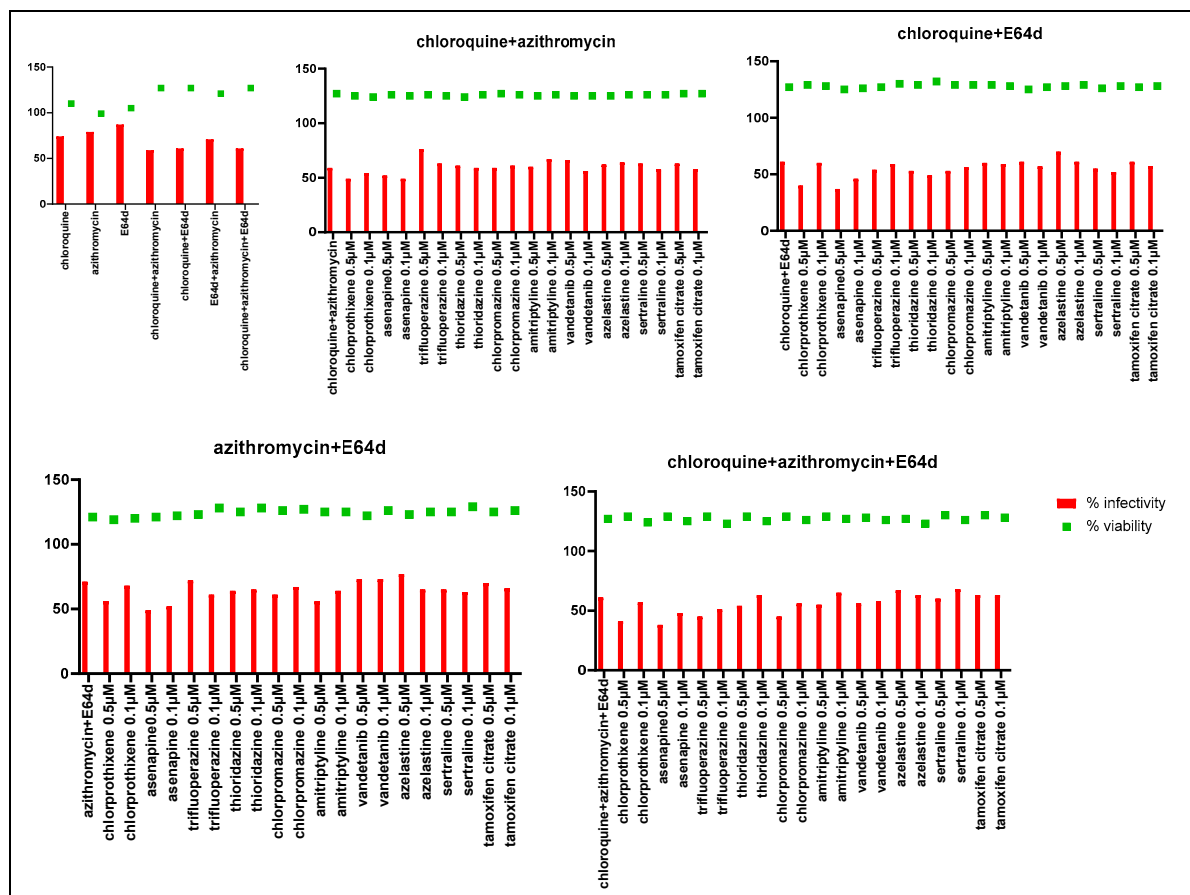

**Figure S7. Drug hits show additive inhibitory effect on SARS-CoV-2 infectivity.** Mouse leukaemia virus pseudotyped with spike protein (S) from severe acute respiratory syndrome coronavirus-2 was used to infect 293T-ACE2 cells in 96-well plate for 48h in the presence of the drug combination in the specified doses, as indicated, with 1h pre-treatment. Infectivity was measured as luciferase activity and expressed as % infectivity to infected, own solvent control (dimethylsulphoxide or water). Viability was measured by XTT assays in un-infected

cells and expressed as % viability to un-infected solvent control (dimethylsulphoxide or water). Data are from one repeat.

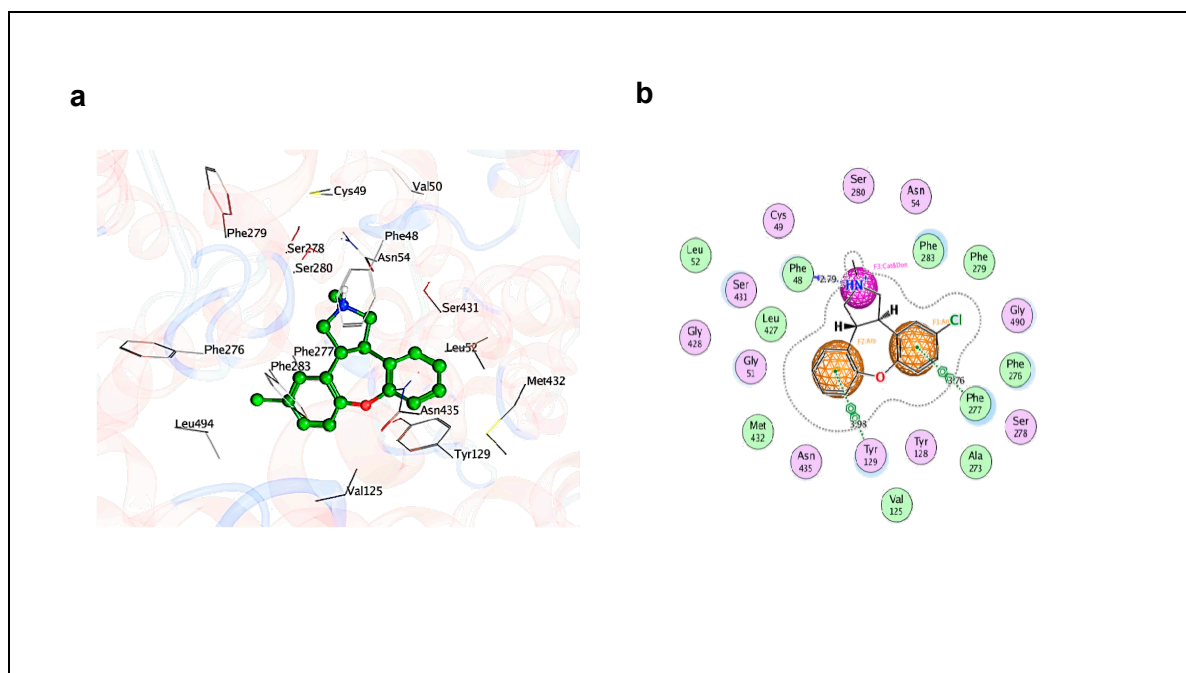

**Figure S8. diagrammatic representation of ligand- protein interaction and pharmacophore mapping.** a) Ligand protein profile of the highest ranked conformation of asenapine within the SLC6a19 binding cavity. b) Two dimensional representation of ligand protein interaction of asenapine overlaid with the pharmacophore model.

## References

1. Renner, T. M., Tang, V. A., Burger, D., and Langlois, M. A. (2020) Intact Viral Particle Counts Measured by Flow Virometry Provide Insight into the Infectivity and Genome Packaging Efficiency of Moloney Murine Leukemia Virus. *J Virol* **94**
